# Supplementary material for: Energetic bi-diazole ‘transformers’ toward high-energy thermostable energetic compounds
Source: Royal Society of Chemistry journal article supplement (doi:10.1039/d3qm00724c), 2023-01-01
Supplement: d3qm00724c1.pdf [file d3qm00724c1.pdf]

## Supporting Information (SI)

# Energetic Bi-diazole 'Transformers' toward High Energy Thermostable Energetic Compounds

*Jingwei Meng<sup>a</sup>, Teng Fei<sup>a\*</sup>, Jinxiong Cai<sup>a</sup>, Qi Lai<sup>a</sup>, Jinya Zhang<sup>a</sup>, Siping Pang<sup>a\*</sup> and Chunlin He<sup>a,b,c\*</sup>*

<sup>a</sup> Experimental Center of Advanced Materials, School of Materials Science & Engineering, Beijing Institute of Technology, Beijing, 10081 (China).

<sup>b</sup> State Key Laboratory of Explosion Science and Technology, Beijing Institute of Technology, Beijing, 10081 (China).

<sup>c</sup> Chongqing Innovation Center, Beijing Institute of Technology, Chongqing 401120, China.

\*Email: [feiteng@bit.edu.cn](mailto:feiteng@bit.edu.cn) (T. Fei); [pangsp@bit.edu.cn](mailto:pangsp@bit.edu.cn) (S. Pang); [chunlinhe@bit.edu.cn](mailto:chunlinhe@bit.edu.cn) (C. He).

## Table of Contents

|                                                                                                       |     |
|-------------------------------------------------------------------------------------------------------|-----|
| 1. Experimental section .....                                                                         | S1  |
| 2. X-ray crystallography details .....                                                                | S3  |
| 3. Heat of formation .....                                                                            | S6  |
| 4. Stability and theoretical analysis .....                                                           | S7  |
| 5. Spectrum Analysis and DSC plots .....                                                              | S9  |
| 6. 90 neutral energetic compounds with a $T_d > 300^\circ\text{C}$ were collected and summarized..... | S13 |
| 7. Reference .....                                                                                    | S23 |

## 1. Experimental section

### 1.1 General methods

All reagents were purchased from Energy Chemical of analytical grade and used without further purification. The  $^1\text{H}$  NMR and  $^{13}\text{C}$  NMR spectra were recorded on Bruker 400 MHz spectrometers at 25 °C. Chemical shifts were reported relative to  $\text{Me}_4\text{Si}$  as external standards. Infrared spectra (IR) were recorded on a Perkin Elmer Spectrum BX FT-IR instrument. Elemental analyses (C, H, N) were carried out on a Vario EL III Analyzer. Melting and decomposition (onset) points were recorded on a differential scanning calorimeter (TA Discovery DSC25) at a scan rate of 10 °C  $\text{min}^{-1}$ . The sensitivities to impact (IS) and friction (FS) were determined according to BAM standards.

### 1.2 Safety precautions

Although none of the energetic materials described herein have exploded or detonated in the course of this research, they are potentially explosive energetic materials that may be sensitive to impact and friction. Appropriate safety precautions should be taken at all times when handling these materials.

### 1.3 Preparation of 4,4'-bipyrazole (1), TNBP-2, and DATNBP-2

Synthetic route of 4,4'-bipyrazole (1) [1] and TNBP-2 according to the reported method (Scheme 1) are provided in this section.

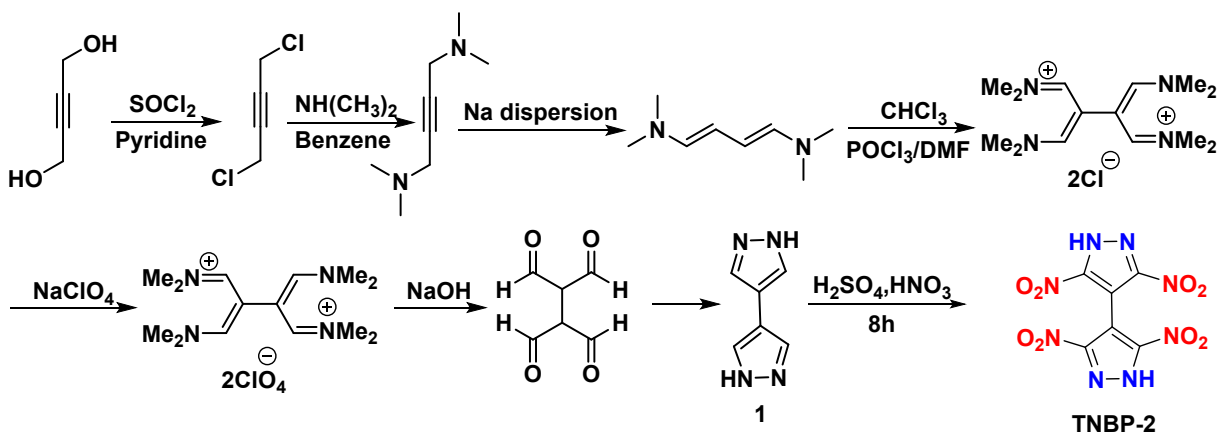

**Synthesis of 4,4'-bipyrazole (1):** The precursor compound 4,4'-bipyrazole was synthesized according to the reported method<sup>1</sup>. The 1,4-bis(dimethylamino)butene was prepared from 1,4-dichloro-2-butyne using  $\text{SOCl}_2$  as a reagent, and its rearrangement into the conjugated cis-trans-butadiene over Na metal dispersion and the subsequent Vilsmeier-Haack-Arnold formylation providing symmetric perchlorate salt. The latter was hydrolyzed to bis-dialdehyde and then

converted into the 4,4-bipyrazole (1).  $^1\text{H}$  NMR( $d_6$ -DMSO):  $\delta$ 7.79, 12.76 (s,2H) ppm;  $^{13}\text{C}$  NMR( $d_6$ -DMSO):  $\delta$ 113.10, 130.76 ppm. Elemental analysis of  $\text{C}_6\text{H}_6\text{N}_4$  (134.14): calcd: C,53.72; H,4.51; N,41.77%; found: C52.93 H4.76, N42.31%.

**Synthesis of 3,3',5,5'-tetranitro-4,4'-bipyrazole (TNBP-2):** Fuming  $\text{HNO}_3$  (2.33 mL, 98%) was added to a warm solution of 1 (0.31 g, 2.3 mmol) in 98%  $\text{H}_2\text{SO}_4$  (14 mL). The mixture was placed into a pre-heated oil bath and the clear solution formed was stirred at  $100^\circ\text{C}$  (bath temperature) for 8 h. After cooling, the mixture containing a colorless solid reaction product was poured into crushed ice and left overnight at  $5\text{--}10^\circ\text{C}$ . The crystalline deposit was filtered (0.706 g, 91%), washed with 40 mL of ice water and dried.  $T_d(\text{onset})$ :  $298^\circ\text{C}$ .  $^1\text{H}$  NMR( $d_6$ -DMSO):  $\delta$ 9.46(s,2H) ppm;  $^{13}\text{C}$  NMR( $d_6$ -DMSO):  $\delta$ 101.04, 149.86 ppm. IR(KBr): 3740, 3208, 2967, 1567, 1519, 1482, 1416, 1348, 1320, 1274, 1207, 1018, 994, 842, 758, 744, 712, 675, 635, 580,  $518\tilde{\text{v}}\text{cm}^{-1}$ . Elemental analysis of  $\text{C}_6\text{H}_2\text{N}_8\text{O}_8$  (314): calcd: C22.94, H0.64, N35.67%; found: C23.06, H0.79, N35.72%.

**Synthesis of 1,1'-diamine-3,3',5,5'-tetranitro-4,4'-bipyrazole (DATNBP-2):** A mixture of TNBP-2(0.34 g, 1.08 mmol) and 1,8-diazabicycloundec-7-ene (DBU) (0.33 g, 2.16 mmol) in anhydrous acetonitrile (15 mL) was stirred at the ambient temperature for 0.5 h. And then fresh O-p-tolylsulfonylhydroxylamine (2.3 equiv, 9.2 mmol) in anhydrous dichloromethane solution (30 mL) was added with portions in 5 min. The mixture was stirred for 2.5 h, and the solvent was removed under vacuum. The DATNBP-2 was obtained by flash chromatography as a yellow solid (0.32 g, 86 %).  $T_d(\text{onset})$ :  $305^\circ\text{C}$ .  $^1\text{H}$  NMR( $d_6$ -DMSO):  $\delta$ 8.03(s,2H), 7.43(s,2H) ppm;  $^{13}\text{C}$  NMR( $d_6$ -DMSO):  $\delta$ 100.50, 140.07, 145.53 ppm. IR(KBr): 3338.29, 3273.72, 1549.05, 1488.96, 1428.07, 1377.52, 1324.73, 1132.00, 1103.58, 1011.12, 868.47, 831.58, 730.06, 627.53, 612.90  $\tilde{\text{v}}\text{cm}^{-1}$ . Elemental analysis of  $\text{C}_6\text{H}_4\text{N}_{10}\text{O}_8$  (344.02): calcd: C20.94, H1.17, N40.70%; found: C20.65, H2.23, N39.03%.

## 2. X-ray crystallography details

### 2.1 Single crystal preparation and crystallographic data

The crystal of **DATNBP-2** suitable for single-crystal XRD was obtained from slow evaporation of its petroleum ether and ethyl acetate solution at room temperature. Crystallographic data of compounds in this study are provided in this section.

### 2.2 Hydrogen bond interaction

The strengths of the relevant intra-/intermolecular interaction were evaluated by the integrated value of the crystal orbital Hamilton population (COHP) below the Fermi energy, using a recently developed High Accuracy Atomistic Simulation for Energetic Materials (HASEM) package [2,3]. The generalized gradient approximation (GGA) is used for the exchange-correlation function in the Perdew-Burke-Ernzerhof (PBE) form.

**Table S1** Crystallographic data for **DATNBP-2**.

| Compound                                 | <b>DATNBP-2</b>                                              | <b>DATNBP-2</b>                                              |
|------------------------------------------|--------------------------------------------------------------|--------------------------------------------------------------|
| CCDC No.                                 | 2268272                                                      | 2206102                                                      |
| Formula                                  | C <sub>6</sub> H <sub>4</sub> N <sub>10</sub> O <sub>8</sub> | C <sub>6</sub> H <sub>4</sub> N <sub>10</sub> O <sub>8</sub> |
| M <sub>w</sub>                           | 344.19                                                       | 344.19                                                       |
| Crystal system                           | orthorhombic                                                 | orthorhombic                                                 |
| Space group                              | Pbca                                                         | Pbca                                                         |
| a[Å]                                     | 12.899(6)                                                    | 12.8197(17)                                                  |
| b[Å]                                     | 6.244(2)                                                     | 6.1427(7)                                                    |
| c[Å]                                     | 30.293(10)                                                   | 30.168(4)                                                    |
| α[°]                                     | 90                                                           | 90                                                           |
| β[°]                                     | 90                                                           | 90                                                           |
| γ[°]                                     | 90                                                           | 90                                                           |
| V[Å <sup>3</sup> ]                       | 2440.0(16)                                                   | 2375.7(5)                                                    |
| Z                                        | 8                                                            | 8                                                            |
| T[K]                                     | 298K                                                         | 170K                                                         |
| λ[Å]                                     | 0.71073                                                      | 0.71073                                                      |
| P <sub>calcd</sub> [g·cm <sup>-3</sup> ] | 1.874                                                        | 1.925                                                        |
| μ[mm <sup>-1</sup> ]                     | 0.173                                                        | 0.178                                                        |
| F(000)                                   | 1392.0                                                       | 1392.0                                                       |
| Crystal size/mm <sup>3</sup>             | 0.12 × 0.06 × 0.05                                           | 0.09×0.04×0.03                                               |
| θ range[°]                               | 4.148-52.826                                                 | 4.166-52.91                                                  |

|                                         |              |              |
|-----------------------------------------|--------------|--------------|
| Index ranges                            | -12 ≤ h ≤ 16 | -14 ≤ h ≤ 14 |
|                                         | -7 ≤ k ≤ 7   | -6 ≤ k ≤ 7   |
|                                         | -37 ≤ l ≤ 37 | -36 ≤ l ≤ 3  |
| Data/restraints/<br>parameters          | 2441/16/229  | 2424/24/226  |
| GOF on F2                               | 1.021        | 1.053        |
| R[F <sup>2</sup> > 2σ(F <sup>2</sup> )] | 0.0803       | 0.0839       |
| wR(F <sup>2</sup> )                     | 0.1862       | 0.1863       |

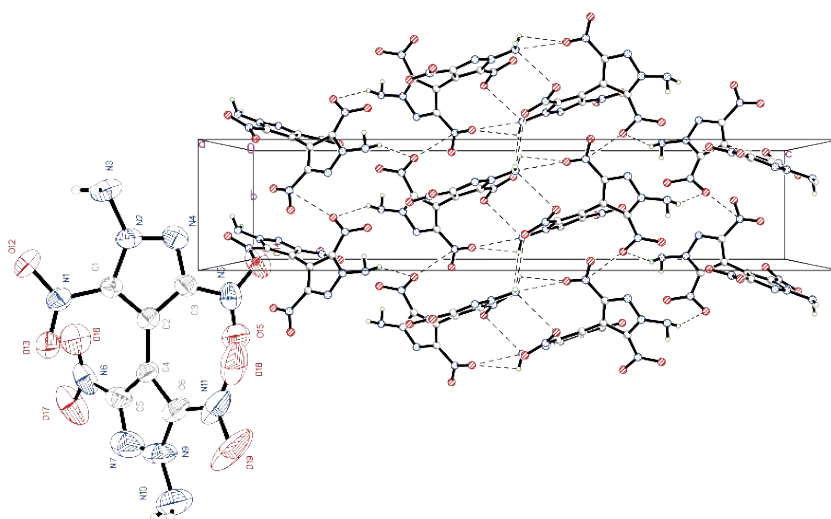

**Figure S1** Single-crystal X-ray structures and packing diagram of **DATNBP-2** at 170K

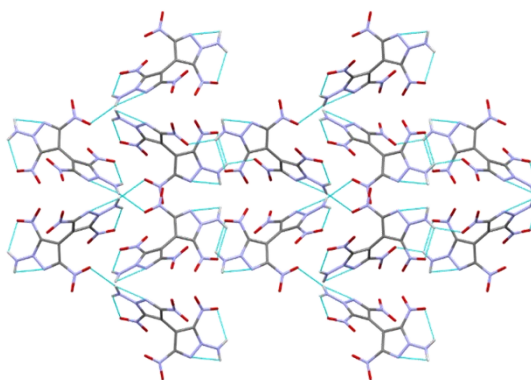

**Figure S2** Hydrogen bonds for **DATNBP-2**.

**Table S2** Hydrogen bonds for **DATNBP-2**.

| D-H...A             | D-H/Å | H...A/Å | D...A/Å   | D-H...A/° | Energy/kcal mol <sup>-1</sup> |
|---------------------|-------|---------|-----------|-----------|-------------------------------|
| N3-H3B...O7         | 0.88  | 2.56    | 2.931(7)  | 106       | 1.345580175                   |
| Intra N3-H3B...O2   | 0.88  | 2.24    | 2.777(6)  | 119       | 4.50832775                    |
| Intra N10-H10A...N9 | 0.88  | 1.58    | 1.97(2)   | 102       | 6.56486332                    |
| Intra N10-H10A...O6 | 0.88  | 2.43    | 2.918(13) | 116       | 2.24655391                    |
| N10-H10A...O3       | 0.88  | 2.14    | 2.909(10) | 146       | 5.114588295                   |

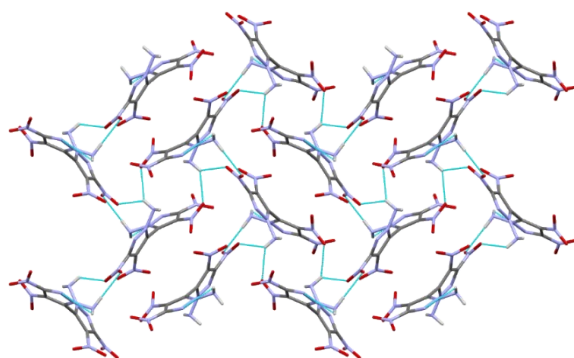

**Figure S3** Hydrogen bonds for **DATNBP-1**.

**Table S3.** Hydrogen bonds for **DATNBP-1**.

| D-H...A     | D-H/Å | H...A/Å | D...A/Å | D-H...A/° | Energy/kcal mol <sup>-1</sup> |
|-------------|-------|---------|---------|-----------|-------------------------------|
| N5-H5B...O2 | 0.87  | 2.24    | 2.944   | 120       | 2.046158                      |
| N5-H5B...O6 | 0.87  | 2.37    | 3.023   | 133       | 1.14726                       |
| N6-H6B...O1 | 0.90  | 2.27    | 3.132   | 160       | 1.396774                      |

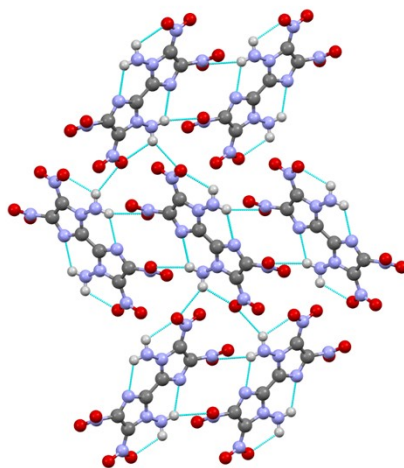

**Figure S4** Hydrogen bonds for **DATNBP-1**.

**Table S4** Hydrogen bonds for **DATNBP-1**.

| D-H...A           | D-H/Å | H...A/Å | D...A/Å | D-H...A/° | Energy/kcal mol <sup>-1</sup> |
|-------------------|-------|---------|---------|-----------|-------------------------------|
| Intra N3-H3B...O1 | 0.86  | 2.24    | 2.759   | 119       | 4.30832775                    |

|                   |      |      |       |     |            |
|-------------------|------|------|-------|-----|------------|
| N3-H3B...O1       | 0.86 | 2.53 | 3.244 | 141 | 1.64121657 |
| N3-H3A...O4       | 0.86 | 2.42 | 3.166 | 145 | 1.92341630 |
| Intra N3-H3B...O1 | 0.86 | 2.26 | 2.830 | 124 | 4.02853527 |

---



### 3. Heat of formation

Theoretical calculations were performed by using the Gaussian09 program and Multiwfn software [4,5]. Gas phase heats of formation of the title compounds were computed based on an isodesmic reaction (Scheme S2). The geometric optimization and frequency analyses of the structures employed B3LYP/6-31++G\*\* level, Zero-point energies (ZPE), and total energy( $E_0$ ) were calculated at the M062X/6-311++(d,p) level.

The heat of formation was obtained by using the isodesmic reaction approach. Atomization energies were obtained by employing the G2 ab initio method. All of the optimized structures were characterized to be true local energy minima on the potential energy surface without imaginary frequencies. The heats of formation in the solid state were further obtained by employing Trouton's rule according to equation 1[6].

$$\Delta H_{Sub} = 188/J \text{ mol}^{-1} K^{-1} \times (1) \quad (1)$$

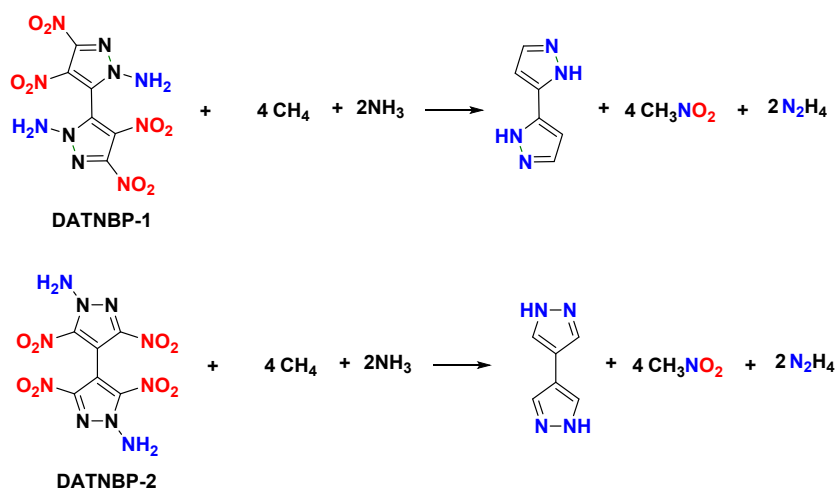

**Scheme S2** Isodesmic reactions for **DATNBP-1**, **DATNBP-2**.

Table S5 The zero point energy (ZPE), temperature correction coefficient ( $H_T$ ), total energy ( $E_0$ ), heat of formation (HOF) of **DATNBP-2**

| Compound                        | ZPE (a.u) | $H_T$ (a.u) | $E_0$ (a.u)  | HOF (kJ mol <sup>-1</sup> ) |
|---------------------------------|-----------|-------------|--------------|-----------------------------|
| <b>DATNBP-1</b>                 | 0.165464  | 0.18725900  | -1376.857830 | 457.5                       |
| <b>DATNBP-2</b>                 | 0.165038  | 0.18662000  | -1376.913937 | 477.3                       |
| CH <sub>4</sub>                 | 0.044558  | 0.00381000  | -40.4966719  | -74.6                       |
| NH <sub>3</sub>                 | 0.034252  | 0.00366528  | -56.5405858  | -45.9                       |
| bipyrazole                      | 0.069995  | 0.00850752  | -448.8305749 | 286.8                       |
| CH <sub>3</sub> NO <sub>2</sub> | 0.049628  | 0.00531000  | -244.9716281 | -81.0                       |
| N <sub>2</sub> H <sub>4</sub>   | 0.053276  | 0.057481    | -111.8435902 | 110.6                       |

## 4. Stability and theoretical analysis

### 4.1 Lattice parameter

Lattice parameter of two **DATNBP-1** were analyzing by using VASP (Vienna Ab initio Simulation Package) [7]. The calculations were performed using projected augmented wave (PAW) formalism of the Kohn–Sham density functional theory. Geometry optimization was done using GGA, including van der Waals interaction using DFT-D3.

**Table S5** Correlation energy of crystal of **DATNBP-1** and **DATNBP-2**

| Name     | Total Energy | Energy of Molecule | Lattice Energy(ev) | Lattice Energy (kJ mol <sup>-1</sup> ) |
|----------|--------------|--------------------|--------------------|----------------------------------------|
| DATNBI   | -388.407881  | -192.58147975      | -1.622460965       | -156.5436329                           |
| DATNBP-1 | -772.6030224 | -191.4780852       | -1.672670425       | -161.3881078                           |
| DATNBP-2 | -1659.130717 | -205.4989431       | -1.892396546       | -182.5884485                           |

### 4.2 The bond properties of selected bonds in **DATNBP-2**, **DATNBP-1**, and **DATNBI**

The Mayer bond orders, the bond dissociation energy (BDE), and the bond length for C-NO<sub>2</sub> bonds in **DATNBP-2**, **DATNBP-1**, and **DATNBI** are calculated by the Gaussian 09 software and Multiwfn software.

**Table S6** The bond properties of selected bonds in **DATNBP-1** and **DATNBP-2**

|          | Label   | BDE (kcal mol <sup>-1</sup> ) | Mayer Order | Bond length (Å) |
|----------|---------|-------------------------------|-------------|-----------------|
| DATNBP-2 | C13-N4  | 64.09                         | 0.89240660  | 1.44877         |
|          | C17-N8  | 65.85                         | 0.89771746  | 1.42808         |
|          | C20-N16 | 64.09                         | 0.89238630  | 1.44877         |
|          | C22-N12 | 65.85                         | 0.89771741  | 1.42808         |
| DATNBP-1 | C19-N15 | 57.58                         | 0.77284767  | 1.45680         |
|          | C20-N16 | 64.20                         | 0.82748265  | 1.42922         |
|          | C23-N17 | 64.20                         | 0.82757670  | 1.42874         |
|          | C24-N18 | 57.58                         | 0.77314367  | 1.45680         |
| DATNBI   | C10-N8  | 59.88                         | 0.82393386  | 1.43285         |
|          | C11-N9  | 57.56                         | 0.74622171  | 1.46854         |
|          | C24-N22 | 59.88                         | 0.82391675  | 1.43286         |
|          | C25-N23 | 57.56                         | 0.74622720  | 1.46853         |

### 4.3 The Hirschfeld Surfaces and The Two-dimensional(2D) Fingerprint

To better understand the relationship between structure and mechanical sensitivity, the Hirschfeld surfaces and the two-dimensional(2D) fingerprint are studied (Fig.S5) [8].

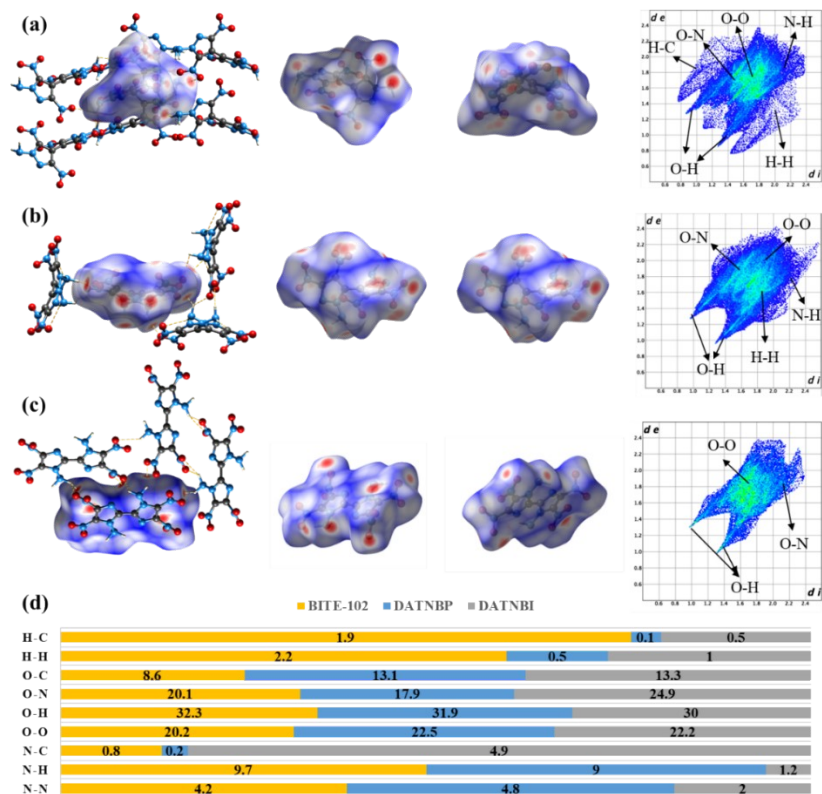

**Figure S5** 2D fingerprint plots in crystal stacking and Hirschfeld surfaces of **DATNBP-2(a)** and **DATNBP-2(b)**, and the individual atomic contact percentage contribution of two **DATNBP-1(c)**.

## 5. Spectrum Analysis and DSC plots

$^1\text{H}$ ,  $^{13}\text{C}$  NMR, and IR spectra of compounds in this study are provided in this section. The thermal stability of DATNBP-2 was tested using the differential scanning calorimeter (DSC) method and the DSC plots are shown in Fig. S13.

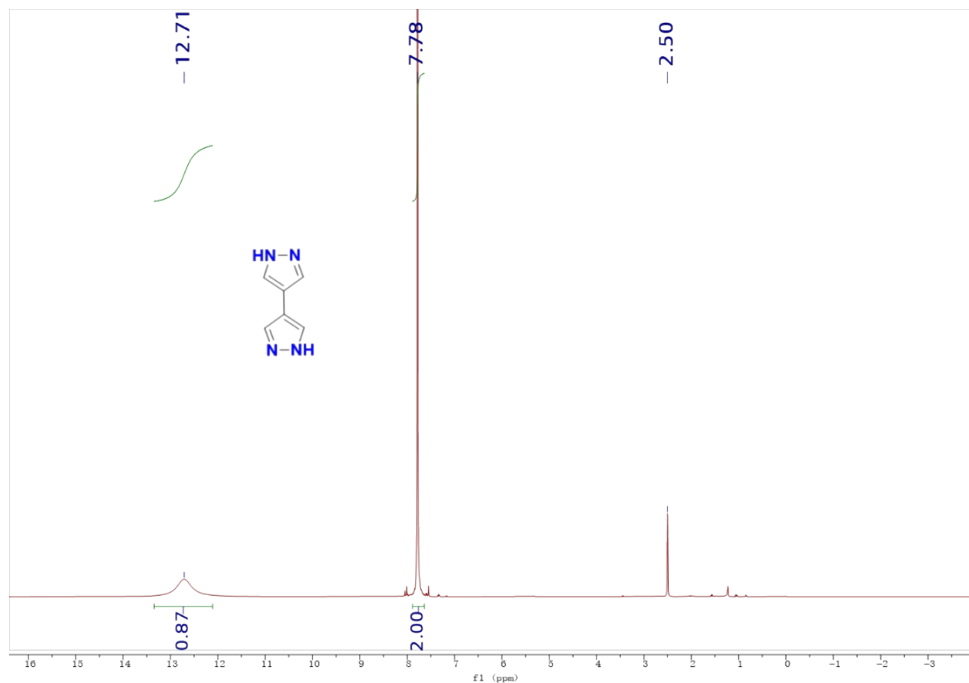

Figure S6  $^1\text{H}$  NMR spectrum of **1** in  $d_6$ -DMSO.

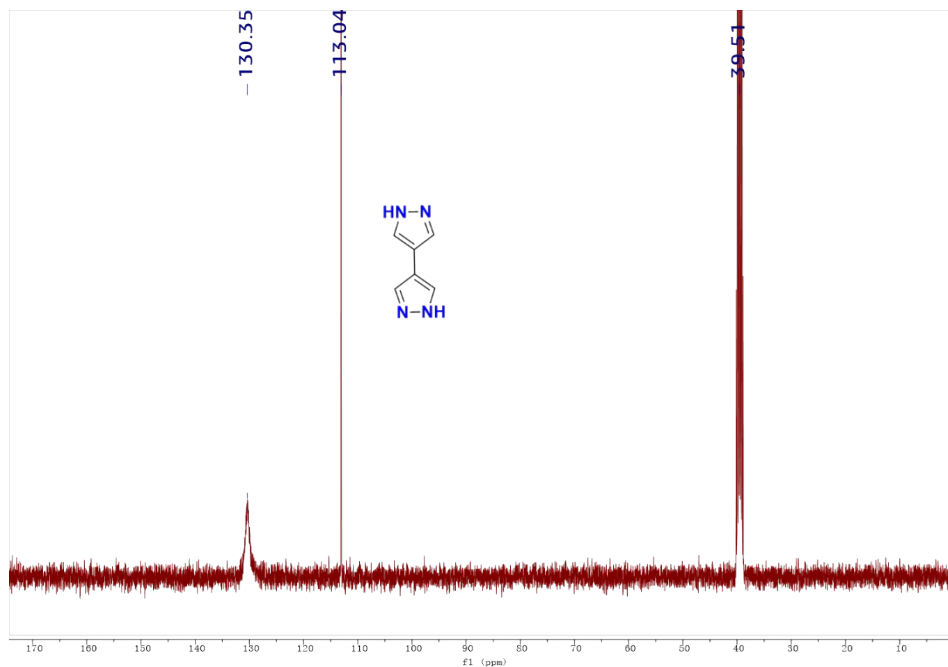

Figure S7  $^{13}\text{C}$  NMR spectrum of **1** in  $d_6$ -DMSO.

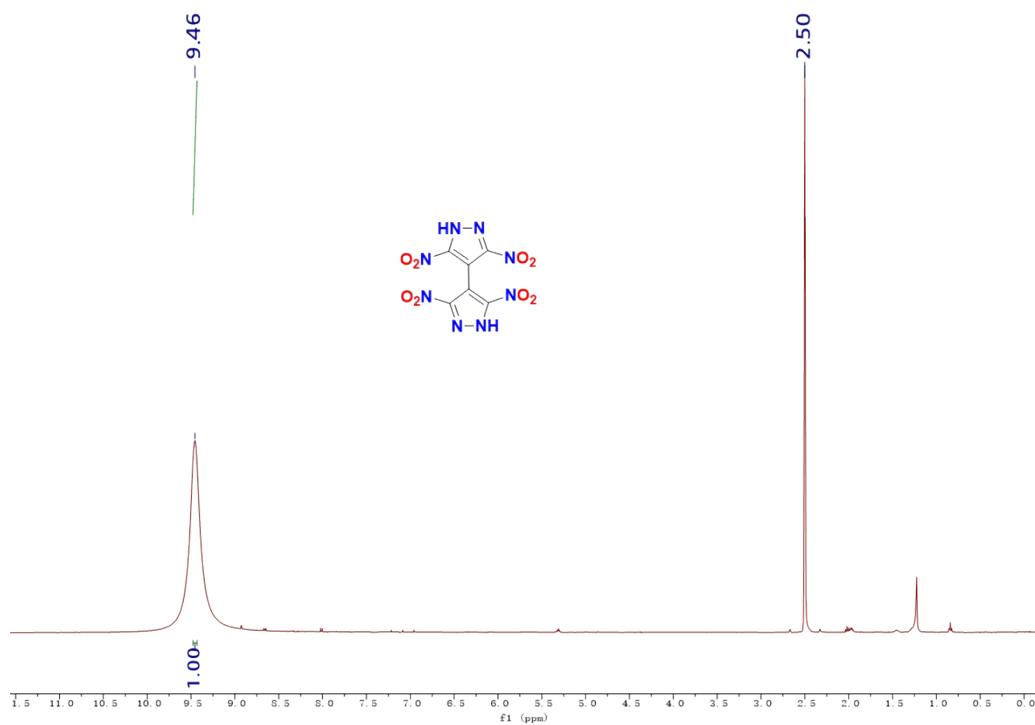

Figure S8  $^1\text{H}$  NMR spectrum of TNBP-2 in  $\text{d}_6$ -DMSO.

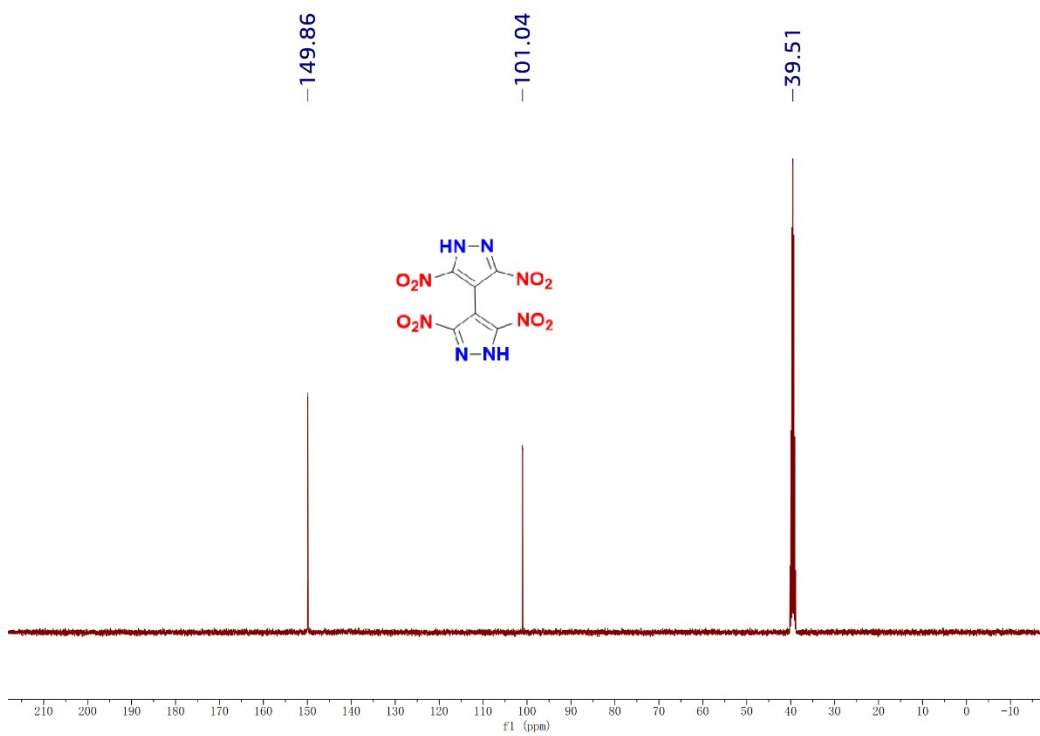

Figure S9  $^{13}\text{C}$  NMR spectrum of TNBP-2 in  $\text{d}_6$ -DMSO.

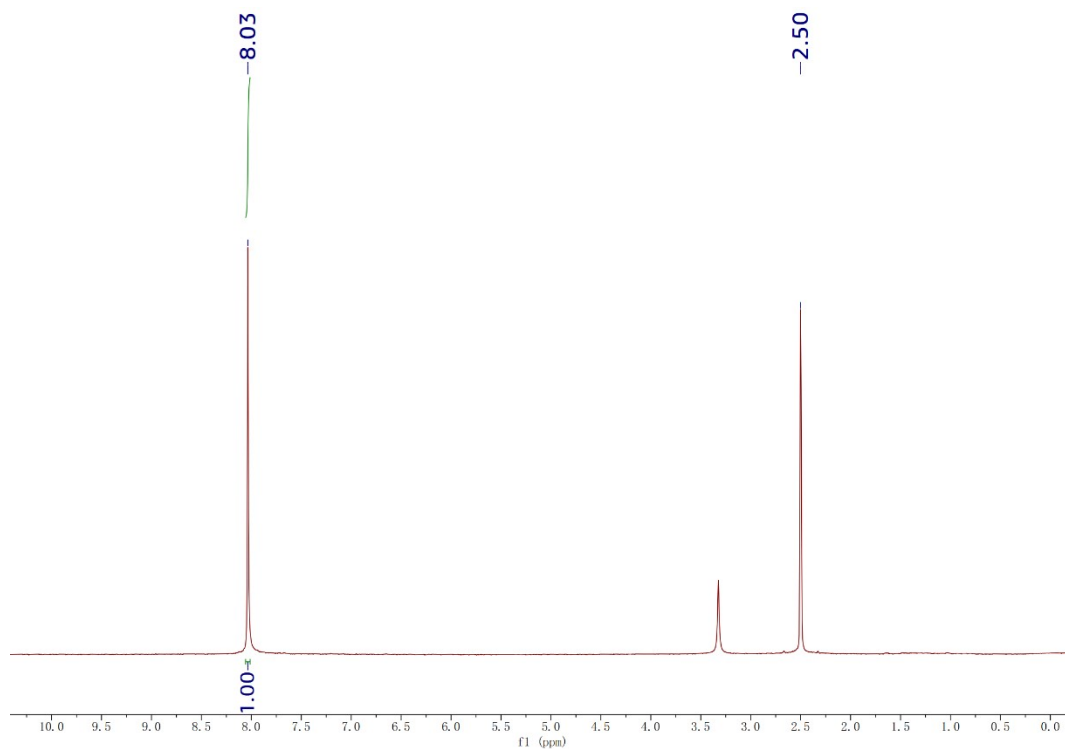

Figure S10  $^1\text{H}$  NMR spectrum of DATNBP-2 in  $d_6$ -DMSO.

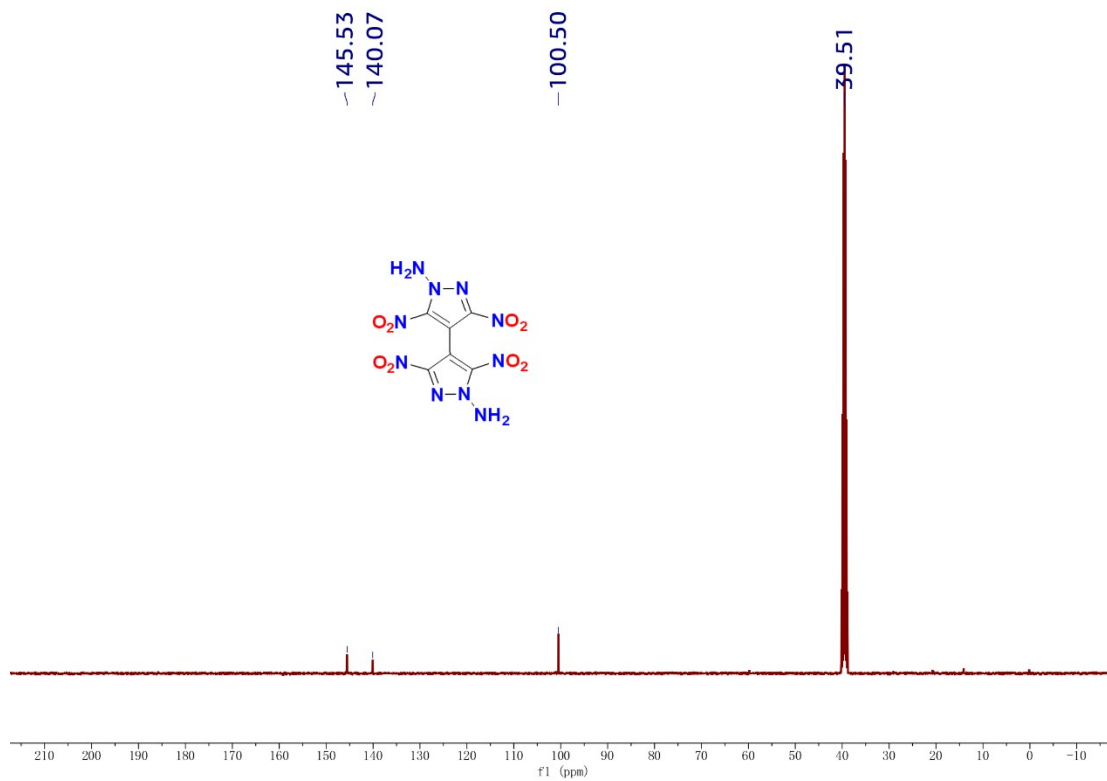

Figure 11  $^{13}\text{C}$  NMR spectrum of DATNBP-2 in  $d_6$ -DMSO.

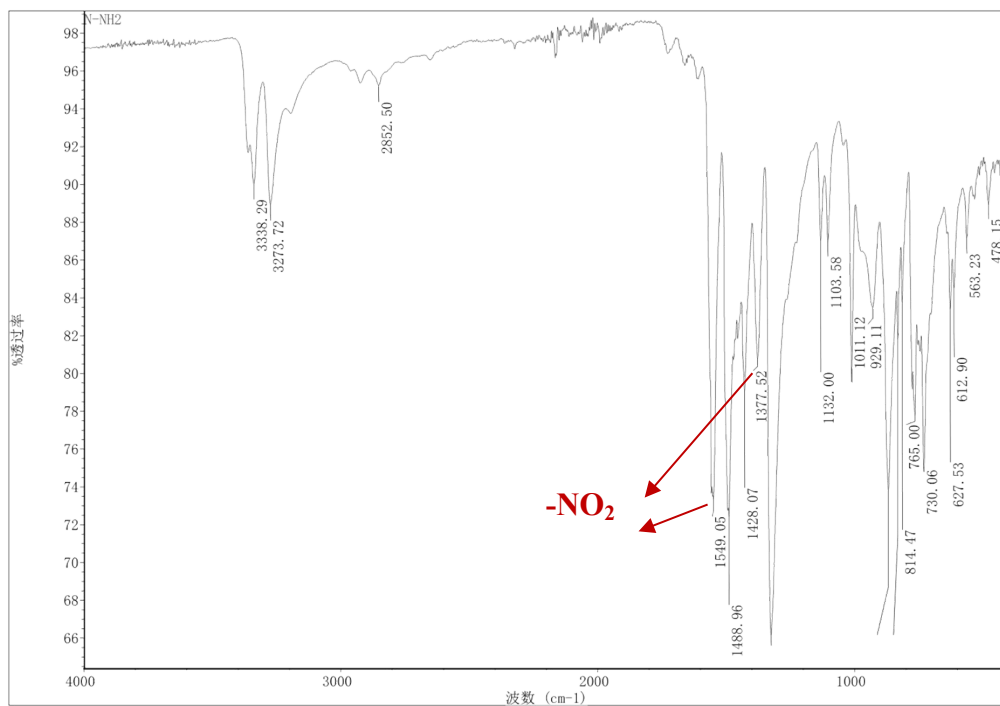

**Figure S12** IR spectrum of compound **DATNBP-2**.

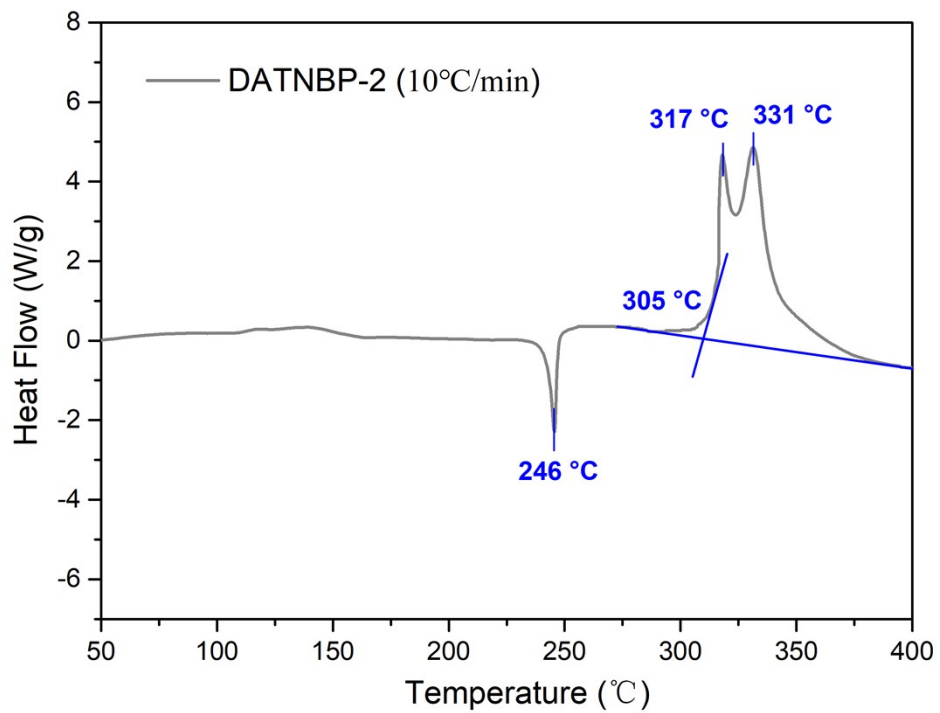

**Figure S13** DSC curve of **DATNBP-2**

6. 90 neutral energetic compounds with a  $T_d > 300^\circ\text{C}$  were collected and summarized

Table S7 90 neutral energetic compounds with a  $T_d > 300^\circ\text{C}$  were collected and summarized

| Compound                                                                            | $D$<br>( $\text{g}\cdot\text{cm}^{-3}$ ) | $T_d$<br>( $^\circ\text{C}$ ) | $D$<br>( $\text{m}\cdot\text{s}^{-1}$ ) | $P$<br>(GPa) | $IS$<br>(J) | $FS$<br>(N) | Ref. |
|-------------------------------------------------------------------------------------|------------------------------------------|-------------------------------|-----------------------------------------|--------------|-------------|-------------|------|
| 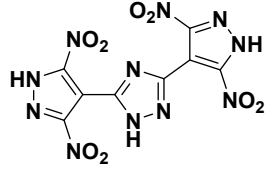   | 1.860                                    | 300                           | 8813                                    | 33.08        | 22          | 300         | 9    |
|    | 1.816                                    | 302                           | 8285                                    | 29.2         | 23          | >360        | 10   |
|    | 1.683                                    | 302                           | 8742                                    | 26.9         | >40         | >360        | 11   |
|   | 1.874                                    | 302                           | 8935                                    | 34.5         | >20         | >360        | 12   |
|  | 1.825                                    | 303                           | 8304                                    | 29.8         | 21          | >360        | 10   |
|  | 1.840                                    | 303                           | 8809                                    | 29.3         | 19          | 288         | 13   |
|  | 1.72                                     | 303                           | 7854                                    | 21.5         | >40         | >360        | 14   |
|  | 1.82                                     | 305                           | 8312                                    | 27           | >80         | >360        | 15   |
|  | 1.91                                     | 305                           | 9200                                    | 34.8         | 16          | >360        | 16   |



|                                                                                     |       |     |      |       |     |      |    |
|-------------------------------------------------------------------------------------|-------|-----|------|-------|-----|------|----|
| 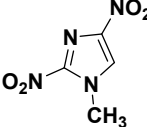   | 1.613 | 305 | 7244 | 21.75 | 23  | 360  | 17 |
|    | 1.733 | 307 | 7838 | 24.1  | 22  | >360 | 18 |
|    | 1.72  | 307 | 8069 | 24.5  | >40 | 360  | 19 |
|    | 1.95  | 307 | 8844 | 34.4  | 13  | 160  | 20 |
|    | 1.75  | 308 | 7939 | 25.6  | >40 | -    | 21 |
|  | 1.745 | 308 | 8329 | 27.9  | 18  | 240  | 22 |
|  | 1.79  | 309 | 8458 | 26.2  | >40 | 360  | 23 |
|  | 1.66  | 309 | 6609 | 13.9  | >40 | >360 | 14 |
|  | 1.802 | 310 | 8332 | 29.6  | 11  | >360 | 24 |
|  | 1.81  | 310 | 9047 | 34.0  | 25  | 360  | 25 |

|                                                                                     |       |     |      |       |     |      |    |
|-------------------------------------------------------------------------------------|-------|-----|------|-------|-----|------|----|
| 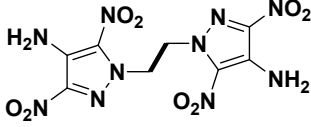   | 1.77  | 311 | 8189 | 27.9  | >40 | >360 | 26 |
|    | 1.69  | 312 | 7698 | 23.4  | 32  | >360 | 10 |
|    | 1.68  | 313 | 7756 | 23.6  | >40 | >360 | 27 |
|    | 1.77  | 314 | 8027 | 26.4  | >40 | >360 | 28 |
|    | 1.882 | 314 | 8889 | 34.3  | 18  | 240  | 29 |
|   | 1.855 | 314 | 8256 | 28.6  | 20  | >360 | 30 |
|  | 1.85  | 315 | 8572 | 31.4  | >60 | >360 | 31 |
|  | 1.94  | 316 | 7850 | 31.3  | 40  | 360  | 32 |
|  | 1.782 | 317 | 7991 | 25.2  | >40 | >360 | 28 |
|  | 1.79  | 317 | 8165 | 26.37 | >40 | >360 | 33 |
|  | 1.74  | 318 | 7612 | 24.3  | 5   | 240  | 33 |

|                                                                                     |       |     |      |       |     |      |    |
|-------------------------------------------------------------------------------------|-------|-----|------|-------|-----|------|----|
|    | 1.71  | 319 | 6988 | 21.4  | >40 | >360 | 34 |
|    | 1.84  | 320 | 8120 | -     | 50  | -    | 35 |
|    | 1.84  | 320 | 7933 | 24.6  | >15 | 360  | 36 |
|    | 1.89  | 322 | 8507 | 30.7  | 16  | 160  | 37 |
|   | 1.685 | 324 | 8423 | 24.16 | >60 | -    | 38 |
|  | 1.88  | 325 | 8338 | 30.7  | 40  | 360  | 39 |
|  | 1.825 | 326 | 8551 | 29.8  | 35  | >360 | 40 |
|  | 1.90  | 327 | 8837 | 32.9  | >40 | >360 | 41 |
|  | 1.804 | 328 | 7535 | 19.2  | >40 | >360 | 42 |
|  | 1.634 | 328 | 7336 | 19.7  | 30  | >360 | 18 |

|                                                                                     |       |     |      |       |     |      |    |
|-------------------------------------------------------------------------------------|-------|-----|------|-------|-----|------|----|
| 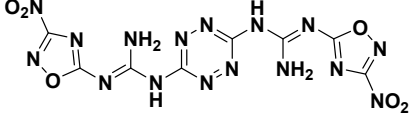   | 1.812 | 328 | 8002 | 28.52 | >70 | -    | 43 |
|    | 1.86  | 329 | 7853 | 24.5  | >40 | -    | 44 |
|    | 1.88  | 329 | 7720 | 24.33 | 8.2 | >360 | 45 |
|    | 1.87  | 331 | 9075 | 30.7  | >80 | >360 | 46 |
|   | 1.887 | 332 | 8538 | 30.4  | >40 | >360 | 47 |
|  | 1.85  | 332 | 8476 | 30.24 | >40 | >360 | 33 |
|  | 1.88  | 332 | 7840 | 27.91 | 20  | -    | 48 |
|  | 1.84  | 335 | 8030 | 27.3  | 5   | >360 | 49 |
|  | 1.872 | 335 | 8657 | 27.82 | >60 | >360 | 50 |
|  | 1.85  | 336 | 8250 | 27.4  | 15  | 160  | 51 |

|  |       |     |      |       |     |      |    |
|--|-------|-----|------|-------|-----|------|----|
|  | 1.851 | 336 | 8568 | 31.4  | 19  | 240  | 52 |
|  | 1.76  | 337 | 7970 | 23.88 | >40 | >360 | 53 |
|  | 1.81  | 337 | 8227 | 26.3  | >40 | >360 | 54 |
|  | 1.80  | 338 | 8099 | 27.14 | >40 | >360 | 55 |
|  | 1.865 | 341 | 8517 | 30.6  | 22  | 352  | 56 |
|  | 1.68  | 341 | 7818 | 20.4  | >40 | >360 | 57 |
|  | 1.92  | 342 | 8639 | 31.7  | 20  | 360  | 60 |
|  | 1.68  | 342 | 8944 | 25.8  | 40  | 360  | 58 |
|  | 1.78  | 343 | 7547 | 21.9  | 10  | 240  | 36 |
|  | 1.743 | 348 | 7849 | 22.16 | >80 | >360 | 59 |

|                                                                                     |       |     |      |       |     |      |    |
|-------------------------------------------------------------------------------------|-------|-----|------|-------|-----|------|----|
| 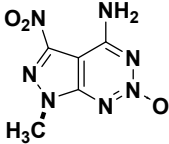   | 1.73  | 348 | 8102 | 25    | 18  | >360 | 60 |
|    | 1.93  | 350 | 8176 | 27.72 | 50  | >360 | 71 |
|    | 1.78  | 350 | 7721 | 26.58 | 60  | -    | 60 |
|    | 1.97  | 350 | 8320 | 34.1  | 87  | 36   | 61 |
|    | 1.772 | 351 | 7871 | 21.8  | >40 | >360 | 62 |
|   | 1.805 | 351 | 8234 | 28.6  | 10  | 352  | 56 |
|  | 1.78  | 353 | 9275 | 28.7  | >80 | >360 | 63 |
|  | 1.786 | 354 | 7558 | 22.29 | >30 | >360 | 64 |
|  | 1.855 | 354 | 8404 | 29.2  | 19  | 240  | 52 |
|  | 1.90  | 355 | 8727 | 32.6  | >60 | >360 | 65 |

|                                                                                     |       |     |      |       |     |      |    |
|-------------------------------------------------------------------------------------|-------|-----|------|-------|-----|------|----|
| 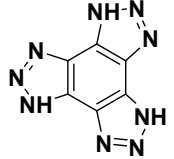   | 1.77  | 356 | 7160 | 19.4  | 18  | -    | 15 |
|    | 1.878 | 358 | 7842 | 27.5  | 15  | >360 | 66 |
|    | 1.76  | 360 | 7757 | 25.1  | 10  | 360  | 71 |
|    | 1.87  | 364 | 8359 | 26.5  | >60 | >360 | 67 |
|   | 1.83  | 365 | 8120 | 26.9  | >40 | >360 | 68 |
|  | 1.82  | 365 | 8528 | 29.4  | 20  | >360 | 60 |
|  | 1.67  | 365 | 7426 | 18.16 | >40 | >360 | 69 |
|  | 1.94  | 366 | 7670 | 24.2  | 9   | >360 | 36 |
|  | 1.81  | 368 | 8054 | 26.53 | >40 | >360 | 55 |
|  | 1.794 | 370 | 7891 | 22.7  | 60  | >360 | 70 |

|                                                                                     |       |     |      |       |     |      |    |
|-------------------------------------------------------------------------------------|-------|-----|------|-------|-----|------|----|
| 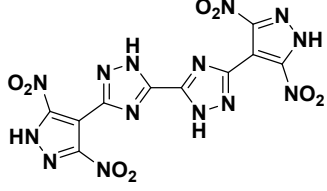   | 1.877 | 372 | 8705 | 32.25 | 26  | >360 | 9  |
|    | 1.81  | 376 | 8026 | 26.2  | >40 | >360 | 68 |
|    | 1.64  | 378 | 7250 | 21.0  | 69  | >360 | 71 |
|    | 1.794 | 382 | 7528 | 22.1  | 30  | >360 | 30 |
|    | 1.75  | 394 | 6198 | 14.5  | 15  | >360 | 71 |
|  | 1.69  | 400 | 7032 | 19.9  | 19  | -    | 15 |
|  | 1.74  | 405 | 7200 | 23.0  | 16  | 300  | 16 |
|  | 1.78  | 406 | 7789 | 21.8  | >40 | >360 | 72 |
|  | 1.82  | 415 | 7874 | 28.2  | 10  | 240  | 73 |



|                                                                                   |       |     |      |       |     |      |    |
|-----------------------------------------------------------------------------------|-------|-----|------|-------|-----|------|----|
| 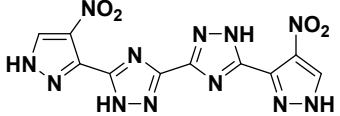 | 1.794 | 425 | 7503 | 21.37 | >30 | >360 | 64 |
|-----------------------------------------------------------------------------------|-------|-----|------|-------|-----|------|----|

## 7. Reference

- [1] I. Gospodinov, K. V. Domasevitch, C. C. Unger, Midway between Energetic Molecular Crystals and High-Density Energetic Salts: Crystal Engineering with Hydrogen Bonded Chains of Polynitro Bipyrazoles. *Cryst. Growth & Des.*, **2020**, 20, 755-764.
- [2] L. Zhang, S. Jiang, Y. Yu, Y. Long, H. Zhao, L. Peng, J. Chen, Phase transition in octahydro-1,3,5,7-tetranitro-1,3,5,7-tetrazocine (HMX) under static compression: An application of the first-principles method specialized for CHNO solid explosives. *J. Phys. Chem. B*, **2016**, 120, 11510-11522.
- [3] Z. Mo, A. Zhang, X. Cao, Q. Liu, X. Xu, H. An, W. Pei, S. Zhu, JASMIN: A parallel software infrastructure for scientific computing. *Front. Comput. Sci.*, **2010**, 4, 480-488.
- [4] J. W. Ochterski, R. L. Martin, K. Morokuma, O. Farkas, J. B. Foresman, D. J. Fox, Gaussian 09, rev. B.01; Wallingford, CT (**2010**).
- [5] T. Lu, F. Chen, Multiwfn: A multifunctional wavefunction analyzer. *J. Comput. Chem.*, **2012**, 33, 580-592.
- [6] M. S. Westwell, M. S. Searle, D. H. Williams, Empirical Correlations between Thermodynamic Properties and Intermolecular Forces. *J. Am. Chem. Soc.*, **1995**, 117, 5013-5015.
- [7] G. G. Kresse, J. J. Furthmüller, Efficient iterative schemes for ab initio total-energy calculations using a plane-wave basis set. *Physical review. B*, **1996**, 54, 11169.
- [8] M. A. Spackman, D. Jayatilaka, Hirshfeld surface analysis. *CrystEngComm*, 2009, 11, 19-32.
- [9] T. Yan, H. Yang, Y. Chen, Z. Yi, S. Zhu, G. Cheng, An advanced and applicable heat-resistant explosive through the controllable regiochemical modulation. *J. Mater. Chem. A*, **2020**, 8, 23857.
- [10] J. Cai, T. Fei, R. Li, J. Xiong, J. Zhang, P. Yin, S. Pang, Intramolecular Assembly of Nitrobiazoles and an Ether Bridge: Toward Energetic Materials with Enhanced Energy and Safety. *ACS Appl. Mater. Interfaces*, **2022**, 14, 52951-52959.
- [11] J. Yount, M. Zeller, 4,4',5,5' -Tetraamino-3,3'-azo-bis-1,2,4-triazole and the electrosynthesis of high-performing insensitive energetic materials. *J. Mater. Chem. A*, **2020**, 8, 19337.
- [12] C. Lei, G. Cheng, Z. Yi, Q. Zhang, H. Yang, A facile strategy for synthesizing promising pyrazole-fused energetic compounds. *Chem. Eng. J*, **2021**, 416, 129190.

- [13] A. Stc, B. Xjq, A. Tll, A. Qhz, Tetrazolo [1,5- b ]pyridazine as a versatile scaffold for construction of multipurpose energetic materials. *Energetic Materials Frontiers*, **2021**, 3, 137-145.
- [14] Y. Tang, K. Li, A. K. Chinnam, R. J. Staples, J. M. Shreeve, Mono-n-oxidation of heterocycle-fused pyrimidines. *Dalton Trans.*, **2021**, 50, 2143.
- [15] H. Gao, Q. Zhang, J.M. Shreeve, Fused heterocycle-based energetic materials. *J. Mater. Chem. A*, **2020**, 8, 4193.
- [16] Y. Liu, G. Zhao, Y. Tang, G. Zhang, Multipurpose [1,2,4]triazolo[4,3-b][1,2,4,5]tetrazine-based energetic materials. *J. Mater. Chem. A*, **2019**, 7, 7875.
- [17] P. Lian, L. Chen, J. Chen, J. Wang, et al. The nitration of 1-methyl-2,4,5-triiodoimidazole and its oxidation by-product under nitration conditions, *J. Energ. Mate.*, **2022**, 40, 46-60.
- [18] Y. Tang, C. He, G. H. Imler, D. A. Parrish, J. M. Shreeve, Ring closure of polynitroazoles via an N, N'-alkylene bridge: towards high thermally stable energetic compounds. *J. Mater. Chem. A*, **2018**, 6, 8382.
- [19] P. Yin, D. A. Parrish, J. M. Shreeve, Bis (nitroamino-1, 2, 4-triazolates): N-Bridging Strategy Toward Insensitive Energetic Materials. *Angew. Chem. Int. Edit.*, **2014**, 53,12889-12892.
- [20] Q. Sun, C. Shen, X. Li, Q. Lin, M. Lu, Combination of four oxadiazole rings for the generation of energetic materials with high detonation performance, low sensitivity and excellent thermal stability. *J. Mater. Chem. A*, **2017**, 5, 11063-11070.
- [21] P. Yin, Q. Zhang, J. Zhang, D. A. Parrish, M. S. Jean'ne, N-Trinitroethylamino functionalization of nitroimidazoles: a new strategy for high performance energetic materials. *J. Mater. Chem. A.*, **2013**, 1, 7500-7510.
- [22] Y. Tang, H. Gao, D. A. Parrish, J. M. Shreeve, 1, 2, 4-Triazole Links and N-Azo Bridges Yield Energetic Compounds. *Chem. Eur. J*, **2015**, 21, 11401-11407.
- [23] Y. Qu, Q. Zeng, J. Wang, Q. Ma, H. Li, H. Li, G. Yang, Furazans with azo linkages: stable CHNO energetic materials with high densities, highly energetic performance, and low impact and friction sensitivities. *Chem. Eur. J*, **2016**, 22, 12527-12532.
- [24] D. Fischer, J. L. Gottfried, T. M. Klapötke, K. Karaghiosoff, J. Stierstorfer, T. G. Witkowski, Synthesis and investigation of advanced energetic materials based on bispyrazolylmethanes. *Angew. Chem. Int. Edit.*, **2016**, 128, 16366-16369.

- [25] Q. Ma, Z. Cheng, L. Yang, W. Du, Y. Yin, W. Ma, J. Li, Accelerated discovery of thermostable high-energy materials with intramolecular donor–acceptor building blocks. *Chem. Commun.*, **2022**, 58, 4460-4463.
- [26] P. Yin, J. Zhang, D. A. Parrish, J. M. Shreeve, Energetic N, N'-Ethylene-Bridged Bis (nitropyrazoles): Diversified Functionalities and Properties. *Chem. Eur. J.*, **2014**, 20, 16529-16536.
- [27] J. Chen, J. Tang, H. Xiong, H. Yang, G. Cheng, Combining triazole and furazan frameworks via methylene bridges for new insensitive energetic materials. *Energetic Materials Frontiers*, **2020**, 1, 34-39.
- [28] T. Yan, G. Cheng, H. Yang, 1, 2, 4-Oxadiazole-Bridged Polynitropyrazole Energetic Materials with Enhanced Thermal Stability and Low Sensitivity. *ChemPlusChem*, **2019**, 84, 1567-1577.
- [29] J. Tang, H. Xiong, H. Yang, G. Cheng, The Design and Synthesis of New Advanced Energetic Materials Based on Pyrazole-triazole Backbones. *Dalton Trans.*, **2023**, 52, 3169-3175.
- [30] K. V. Domasevitch, I. Gospodinov, H. Krautscheid, T. M. Klapötke, J. Stierstorfer, Facile and selective polynitrations at the 4-pyrazolyl dual backbone: straightforward access to a series of high-density energetic materials. *New J. Chem.*, **2019**, 43(3), 1305-1312.
- [31] Y. Tang, C. He, G. H. Imler, D. A. Parrish, M. S. Jean'ne, A C-C bonded 5, 6-fused bicyclic energetic molecule: Exploring an advanced energetic compound with improved performance. *Chem. Commun.*, **2018**, 54, 10566-10569.
- [32] Z. L. Chioato, T. M. Klapötke, F. Mieskes, J. Stierstorfer, M. Weyrauther, (Picrylamino)-1, 2, 4-triazole Derivatives—Thermally Stable Explosives. *Eur. J. Inorg. Chem.*, **2016**, 7, 956-962.
- [33] G. Zhang, W. Hu, J. Ma, H. Yang, G. Cheng, Combining 5, 6-fused triazolo-triazine with pyrazole: A novel energetic framework for heat-resistant explosive. *Chem. Eng. J.*, **2021**, 426, 131297.
- [34] J. Zhang, F. Bi, J. Zhang, X. Wang, Z. Yang, G. Zhang, B. Wang, Synthetic and thermal studies of four insensitive energetic materials based on oxidation of the melamine structure. *RSC adv.*, **2021**, 11, 288-295.
- [35] J. P. Agrawal, Some new high energy materials and their formulations for specialized

- applications. *Propell. Explos. Pyrot.*, **2005**, 30, 316-328.
- [36] W. Geng, Q. Ma, Y. Chen, W. Yang, Y. Jia, J. Li, S. M. Wang, Structure–performance relationship in thermally stable energetic materials: tunable physical properties of benzopyridotetraazapentalene by incorporating amino groups, hydrogen bonding, and  $\pi$ – $\pi$  interactions. *Crys. Growth & Des.*, **2020**, 20, 2106-2114.
- [37] B. Wang, H. Xiong, G. Cheng, Z. Zhang, H. Yang, An unexpected method to synthesise 1, 2, 4-oxadiazolone derivatives: a class of insensitive energetic materials. *New J. Chem.*, **2018**, 42, 19671-19677.
- [38] G. H. Tao, B. Twamley, M. S. Jean'ne, A thermally stable nitrogen-rich energetic material-3, 4, 5-triamino-1-tetrazolyl-1, 2, 4-triazole (TATT). *J. Mater. Chem. A*, **2009**, 19, 5850-5854.
- [39] F. Yang, Y. Xu, P. Wang, Q. Lin, F. Bi, N. Liu, M. Lu, Pyrazolo [1, 5-a] pyrimidine with similar “amino–nitro–amino” arrangement characteristics to TATB: a novel heat-resistant explosive with fused structure. *CrystEngComm.*, **2021**, 23, 2801-2808.
- [40] Y. Wang, Q. Zhang, S. Song, Preparation of 7,8-dinitropyrazolo[1,5-a][1,3,5]triazine-2,4-diamine useful for producing energetic materials. **2021**, CN 112851681.
- [41] C. Li, C. Lei, J. Tang, T. Zhu, G. Cheng, H. Yang, C-C bonded bis-5, 6 fused triazole–triazine compound: an advanced heat-resistant explosive with high energy and low sensitivity. *Dalton Trans.*, **2022**, 51, 15292-15299.
- [42] Z. Yin, W. Huang, Z. Zeng, Y. Liu, Y. Tang, Reducing the Electron Delocalization of FOX-7 toward a Thermally Stable Explosive as a Hexanitrosilbene (HNS) Replacement. *Cryst. Growth. & Des.*, **2022**, 22, 1867-1873.
- [43] Z. Fu, Y. Wang, L. Yang, R. Su, J. Chen, F. Nie, F. Chen, Synthesis and characteristics of novel, high-nitrogen 1, 2, 4-oxadiazoles. *RSC adv.*, **2014**, 4, 11859-11861.
- [44] L. Ding, P. Wang, Q. Lin, D. Li, Y. Xu, M. Lu, Synthesis, characterization and properties of amphoteric heat-resistant explosive materials: Fused [1, 2, 5] oxadiazolo [3', 4': 5, 6] pyrido [4, 3-d][1, 2, 3] triazines. *Chem. Eng. J.*, **2022**, 432, 134293.
- [45] A. K. Chinnam, R. J. Staples, J. M. Shreeve, Nucleophilic catalyzed structural binary cleavage of a fused [5, 5]-bicyclic compound. *Org. Lett.*, **2021**, 23, 9408-9412.
- [46] Q. Ma, G. Zhang, J. Li, Z. Zhang, H. Lu, L. Liao, F. Nie, Pyrazol-triazole energetic hybrid with high thermal stability and decreased sensitivity: facile synthesis, characterization and promising performance. *Chem. Eng. J.*, **2020**, 379, 122331.

- [47] K. Li, W. Huang, Z. An, X. Wei, Y. Tang, Efficient Synthesis of a Superior Heat-Resistant Energetic Material Based on Fused Pyrazolotriazine Ring. *Cryst. Growth & Des.*, **2021**, 21, 6872-6878.
- [48] D. Sheng, L. Chen, B. Yang, Y. Zhu, Performances of New Heat-resistant Insensitive Booster Explosive 2,5-Dipicryl-1,3,4-oxadiazole. *Chinese Journal of Energetic Materials*, **2011**, 19, 184 -188.
- [49] T. M. Klapötke, T. G. Witkowski, 5,5'-Bis (2, 4, 6-trinitrophenyl)-2, 2'-bi (1, 3, 4-oxadiazole)(TKX-55): Thermally Stable Explosive with Outstanding Properties. *ChemPlusChem*, **2016**, 81, 357-360.
- [50] Z. Cheng, Z. Zhang, Q. Ma, L. Yang, H. Yang, G. Cheng, W. Yang, A potential insensitive-highly-energetic material through conjugation-promoted N-oxidation strategy. *Chem. Eng. J.*, **2022**, 436, 131990.
- [51] P. Yin, J. Zhang, L. A. Mitchell, D. A. Parrish, J. M. Shreeve, 3, 6-Dinitropyrazolo [4, 3-c] pyrazole-Based Multipurpose Energetic Materials through Versatile N-Functionalization Strategies. *Angew. Chem. Int. Ed.*, **2016**, 128, 13087-13089.
- [52] J. Cai, C. Xie, J. Xiong, J. Zhang, P. Yin, S. Pang, High performance and heat-resistant pyrazole-1, 2, 4-triazole energetic materials: tuning the thermal stability by asymmetric framework and azo-bistriazole bridge. *Chem. Eng. J.*, **2022**, 433,134480.
- [53] S. Manzoor, P. He, J. Q. Yang, Q. Tariq, J. R. Li, Y. Hu, et al. Synthesis and characterization of energetic compounds based on N-oxidation of 5-Nitroso-2, 4, 6-triaminopyrimidine. *J. Mol. Struct.*, **2021**, 1242, 130732.
- [54] Q. Wang, C. J. Lei, J. Tang, G. B. Cheng, H. W. Yang, Heat-Resistant and Low Sensitivity Energetic Material Constructed with [1, 2, 4] Triazolo [4, 3-a] pyridine Framework. *Propell. Explos. Pyrot.*, **2022**, 14, e202200178.
- [55] T. Yan, G. Cheng, H. Yang, 1, 3, 4-Oxadiazole based thermostable energetic materials: Synthesis and structure–property relationship. *New J. Chem.* **2022**, 44(16), 6643-6651.
- [56] H. Li, L. Zhang, N. Petrutik, K. Wang, Q. Ma, D. Shem-Tov, M. Gozin, Molecular and crystal features of thermostable energetic materials: guidelines for architecture of “bridged” compounds. *ACS Cent. Sci.*, **2019**, 6,54-75.
- [57] Y. Tang, Z. Yin, A. K. Chinnam, R. J. Staples, J. M. Shreeve, A duo and a trio of triazoles as very thermostable and insensitive energetic materials. *Inorg. Chem.*, **2020**, 59, 17766-

17774.

- [58] T. M. Klapötke, P. C. Schmid, S. Schnell, J. Stierstorfer, Thermal stabilization of energetic materials by the aromatic nitrogen-rich 4, 4', 5, 5'-tetraamino-3, 3'-bi-1, 2, 4-triazolium cation. *J. Mater. Chem. A.*, **2015**, 3, 2658-2668.
- [59] Y. Cao, Z. Cai, H. Xia, K. Wang, Y. Liu, Q. Zhang, W. Zhang, Simple reaction to prepare a heat-resistant and insensitive explosive (2-nitro-[1, 2, 4] triazolo [1, 5-a][1, 3, 5] triazine-5, 7-diamine) and its derivatives. *Chem. Eng. J.*, **2022**, 432, 134297.
- [60] M. Deng, F. Chen, S. Song, S. Huang, Y. Wang, Q. Zhang, From the sensitive primary explosive ICM-103 to insensitive heat-resistant energetic materials through a local azide-to-amino structural modification strategy. *Chem. Eng. J.*, **2022**, 429, 132172.
- [61] S. Mousavi, K. Esmailpour, M. H. Keshavarz, Preparation and characterization of nano N,N'-bis(1,2,4-triazol-3-yl)- 4,4'-diamino-2,2', 3,3', 5,5', 6,6'-octanitroazo-benzene explosive. *Indian J. Eng. Mater. S.*, **2014**, 21, 585-588.
- [62] W. Cao, W. Dong, Z. Lu, Y. Bi, Y. Hu, T. Wang, J. Zhang, Construction of Coplanar Bicyclic Backbones for 1, 2, 4-Triazole-1, 2, 4-Oxadiazole-Derived Energetic Materials. *Chem. Eur. J.*, **2021**, 27, 13807-13818.
- [63] W. Geng, Y. Jia, Y. Chen, Q. Ma, G. Fan, L. Liao, Superior thermally robust energetic materials featuring Z-E isomeric bis (3, 4-diamino-1, 2, 4-triazol-5-yl)-1 H-pyrazole: self-assembly nitrogen-rich tubes and templates with Hofmeister anion capture architecture. *CrystEngComm*, **2022**, 22, 3144-3154.
- [64] T. Yan, J. Ma, H. Yang, G. Cheng, Introduction of energetic bis-1, 2, 4-triazoles bridges: A strategy towards advanced heat resistant explosives. *Chem. Eng. J.*, **2022**, 429, 132416.
- [65] Y. Tang, C. He, G. H. Imler, D. A. Parrish, J. M. Shreeve, Aminonitro groups surrounding a fused pyrazolotriazine ring: a superior thermally stable and insensitive energetic material. *ACS Appl. Energy Mater.*, **2019**, 2, 2263-2267.
- [66] X. Li, B. L. Wang, Q. H. Lin, Compatibility study of 2, 6-diamino-3, 5-dinitropyridine-1-oxide with some energetic materials. *Cent. Eur. J. of Energ. Mat.*, **2016**, 13, 978-988.
- [67] Z. Zeng, Y. Liu, W. Huang, M. S. Jean'ne, Y. Tang, Radical-mediated C–N bond activation in 3, 5-diamino-4-nitro-1 H-pyrazole towards high-energy and insensitive energetic materials. *J. Mater. Chem. A.*, **2022**, 10, 8268-8272.
- [68] D. Kumar, Y. Tang, C. He, G. H. Imler, D. A. Parrish, J. M. Shreeve, Multipurpose

- Energetic Materials by Shuffling Nitro Groups on a 3, 3'-Bipyrazole Moiety. *Chem. Eur. J.*, **2018**, 24, 17220-17224.
- [69] G. Zhang, H. Xiong, P. Yang, C. Lei, W. Hu, G. Cheng, H. Yang, A high density and insensitive fused [1, 2, 3] triazolo-pyrimidine energetic material. *Chem. Eng. J.*, **2021**, 404, 126514.
- [70] Z. Cheng, W. Yang, Q. Ma, Z. Q. Zhang, L. Yang, H. Yang, G. Cheng, Constructing heat-resistant and insensitive energetic compounds with the introduction of cyano group into fused pyrazolotriazine skeleton. *Cryst. Growth & Des.*, **2021**, 22, 334-340.
- [71] Ł. Gutowski, W. Trzciński, M. Szala, 5, 5', 6, 6'-Tetranitro-2, 2'-bibenzimidazole: A Thermally Stable and Insensitive Energetic Compound. *ChemPlusChem*, **2018**, 83, 87-91.
- [72] Y. Tang, J. Ma, G. H. Imler, D. A. Parrish, M. S. Jean'ne, Versatile functionalization of 3, 5-diamino-4-nitropyrazole for promising insensitive energetic compounds. *Dalton Trans.*, **2019**, 48, 14490-14496.
- [73] N. Liu, Y. J. Shu, H. Li, L. J. Zhai, Y. N. Li, B. Z. Wang, Synthesis, characterization and properties of heat-resistant explosive materials: polynitroaromatic substituted difurazano [3, 4-b: 3', 4'-e] pyrazines. *RSC Adv.*, **2015**, 5 43780-43785.
